# Supplementary material
Source: PubMed Central journal article supplement (PMC8097359)
Supplement: EMBR-22-e51573-s001.pdf [file EMBR-22-e51573-s001.pdf]

## Expanded View Figures

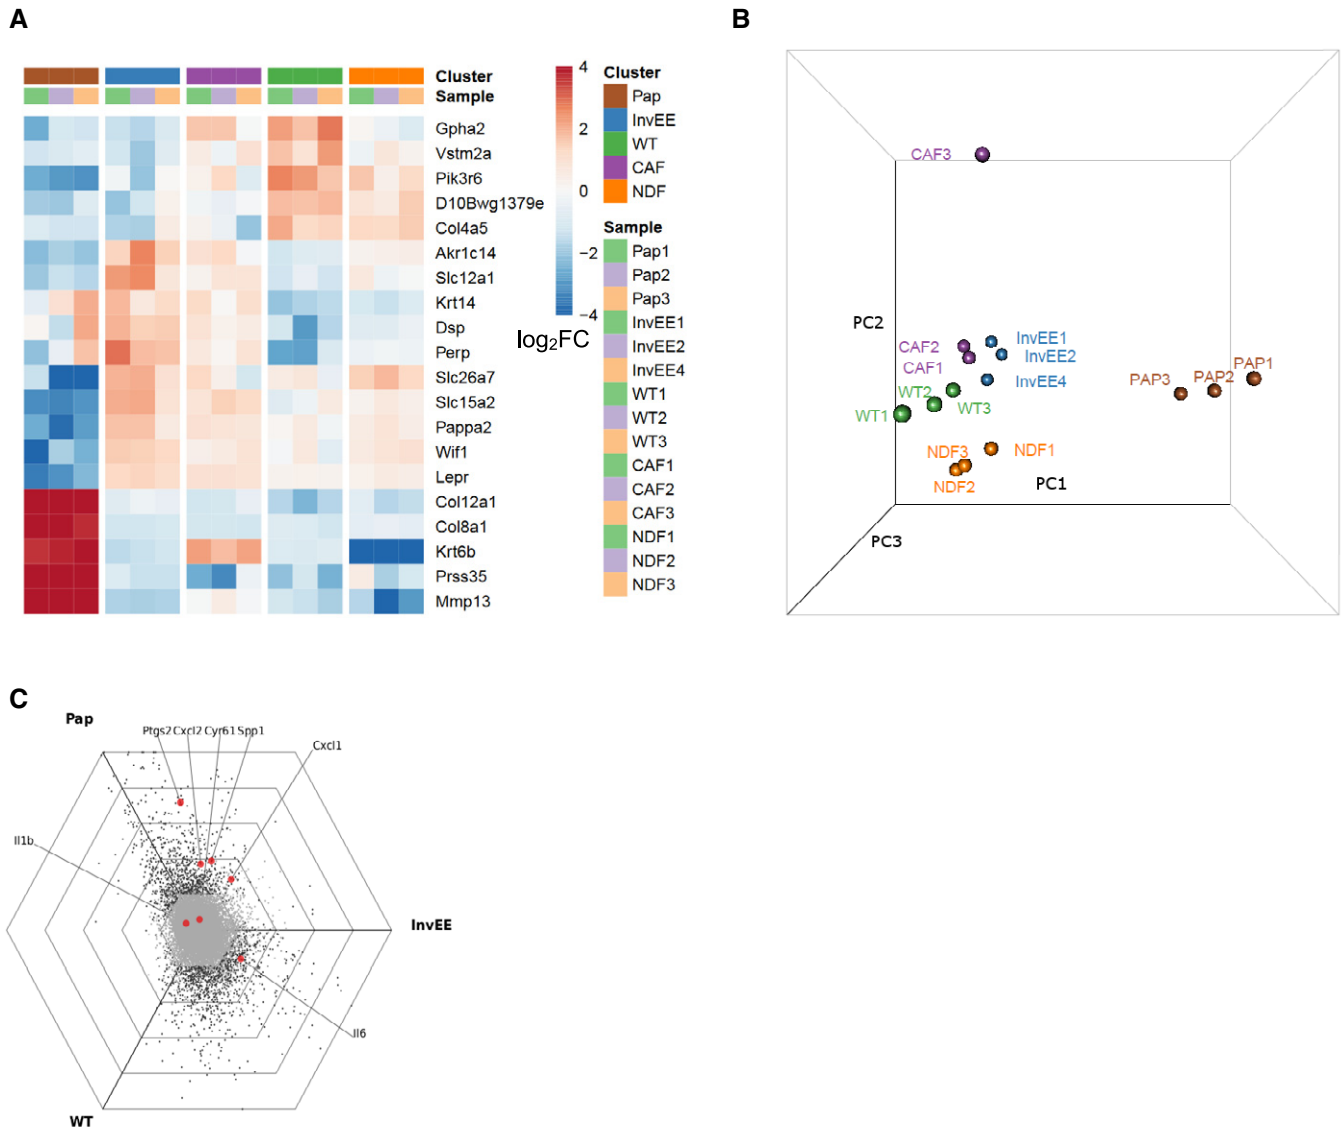

**Figure EV1. Comparison of the InvEE CAF signature with the pro-inflammatory CAF signature characterized by Erez *et al* (2010).**

A Combined clustering of our dataset (WT: normal skin, InvEE: inflammatory skin and Pap: wound-induced papillomas) and the dataset obtained by Erez *et al* (NDF: normal dermal fibroblasts and CAF: cancer-associated fibroblasts) based on global differential gene expression.

B Principle component analysis of our dataset and the dataset from Erez *et al* purple: CAF, orange: NDF, blue: InvEE, green: WT and brown: Pap).

C Hexagonal triwise plot showing the pro-inflammatory gene signature, determined by Erez *et al* and mapped on our gene expression analysis. (Ptgs2 = Cox2, SPP1 = Osteopontin, Cyr61 = CCN1).

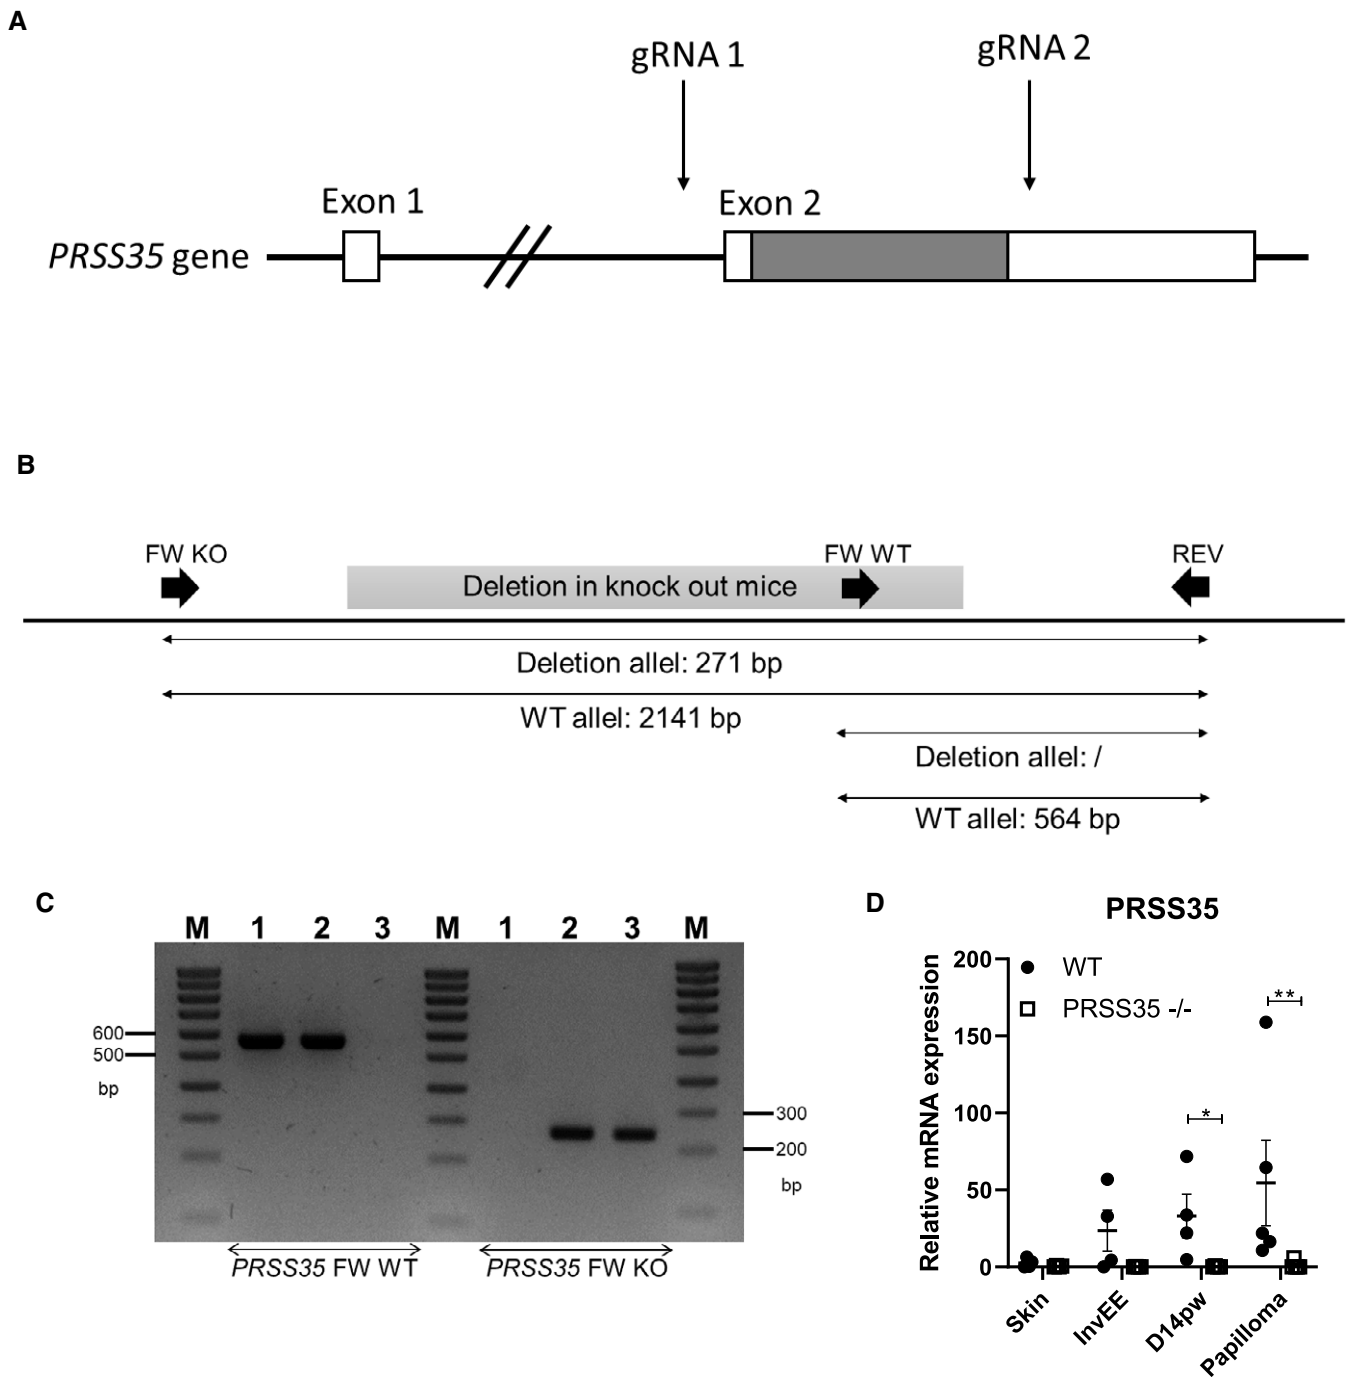

**Figure EV2. Generation of PRSS35 knockout (B6J-Prss35em11rc) mice.**

- A Positioning of CRISPR-Cas gRNAs on the *PRSS35* gene. The sequence between the two gRNAs was deleted upon cleavage by CRISPR-Cas9 at the site of the gRNAs. The coding region is shaded.
- B Genotyping strategy for detection of the presence or absence of PRSS35. Schematic representation of the primer bindings sites used.
- C An agarose gel image for PRSS35 genotyping. M: Ladder, 1-3: genomic DNA extracted from tails from a WT, PRSS35 heterozygous and PRSS35 KO mouse.
- D Relative mRNA expression levels of PRSS35 in tissue isolated from WT and PRSS35<sup>-/-</sup> mice ( $n \geq 4$  per condition; \* $P < 0.05$ , \*\* $P < 0.01$ ; Mann-Whitney test).

**Figure EV3. PRSS35 does not alter proliferation or inflammatory responses in fibroblasts.**

- A Cell proliferation assay on PRSS35 WT and PRSS35 KO primary fibroblasts, as measured through live cell imaging ( $n = 3$  biological replicates per condition, ns, Wilcoxon matched-paired rank test). Data represent means  $\pm$  SEM
- B Scratch wound assay of PRSS35 WT and PRSS35 KO primary fibroblasts. Scratch width was measured over time with live cell imaging ( $n = 3$  per condition, ns, Wilcoxon matched-paired rank test). Data represent means  $\pm$  SEM
- C, D Relative RNA expression of the indicated genes in primary fibroblast isolated from WT and PRSS35 KO mice, untreated or after 24 h stimulation with 10 ng/ml TGF- $\beta$  ( $n = 6$  per genotype) or 20 ng/ml IL-1 $\beta$  (WT,  $n = 5$ ; PRSS35 KO,  $n = 6$ ) (\* $P < 0.05$ , \*\* $P < 0.01$ , \*\*\* $P < 0.001$ , \*\*\*\* $P < 0.0001$ ; two-way ANOVA with multiple comparisons). Data represent means  $\pm$  SEM.

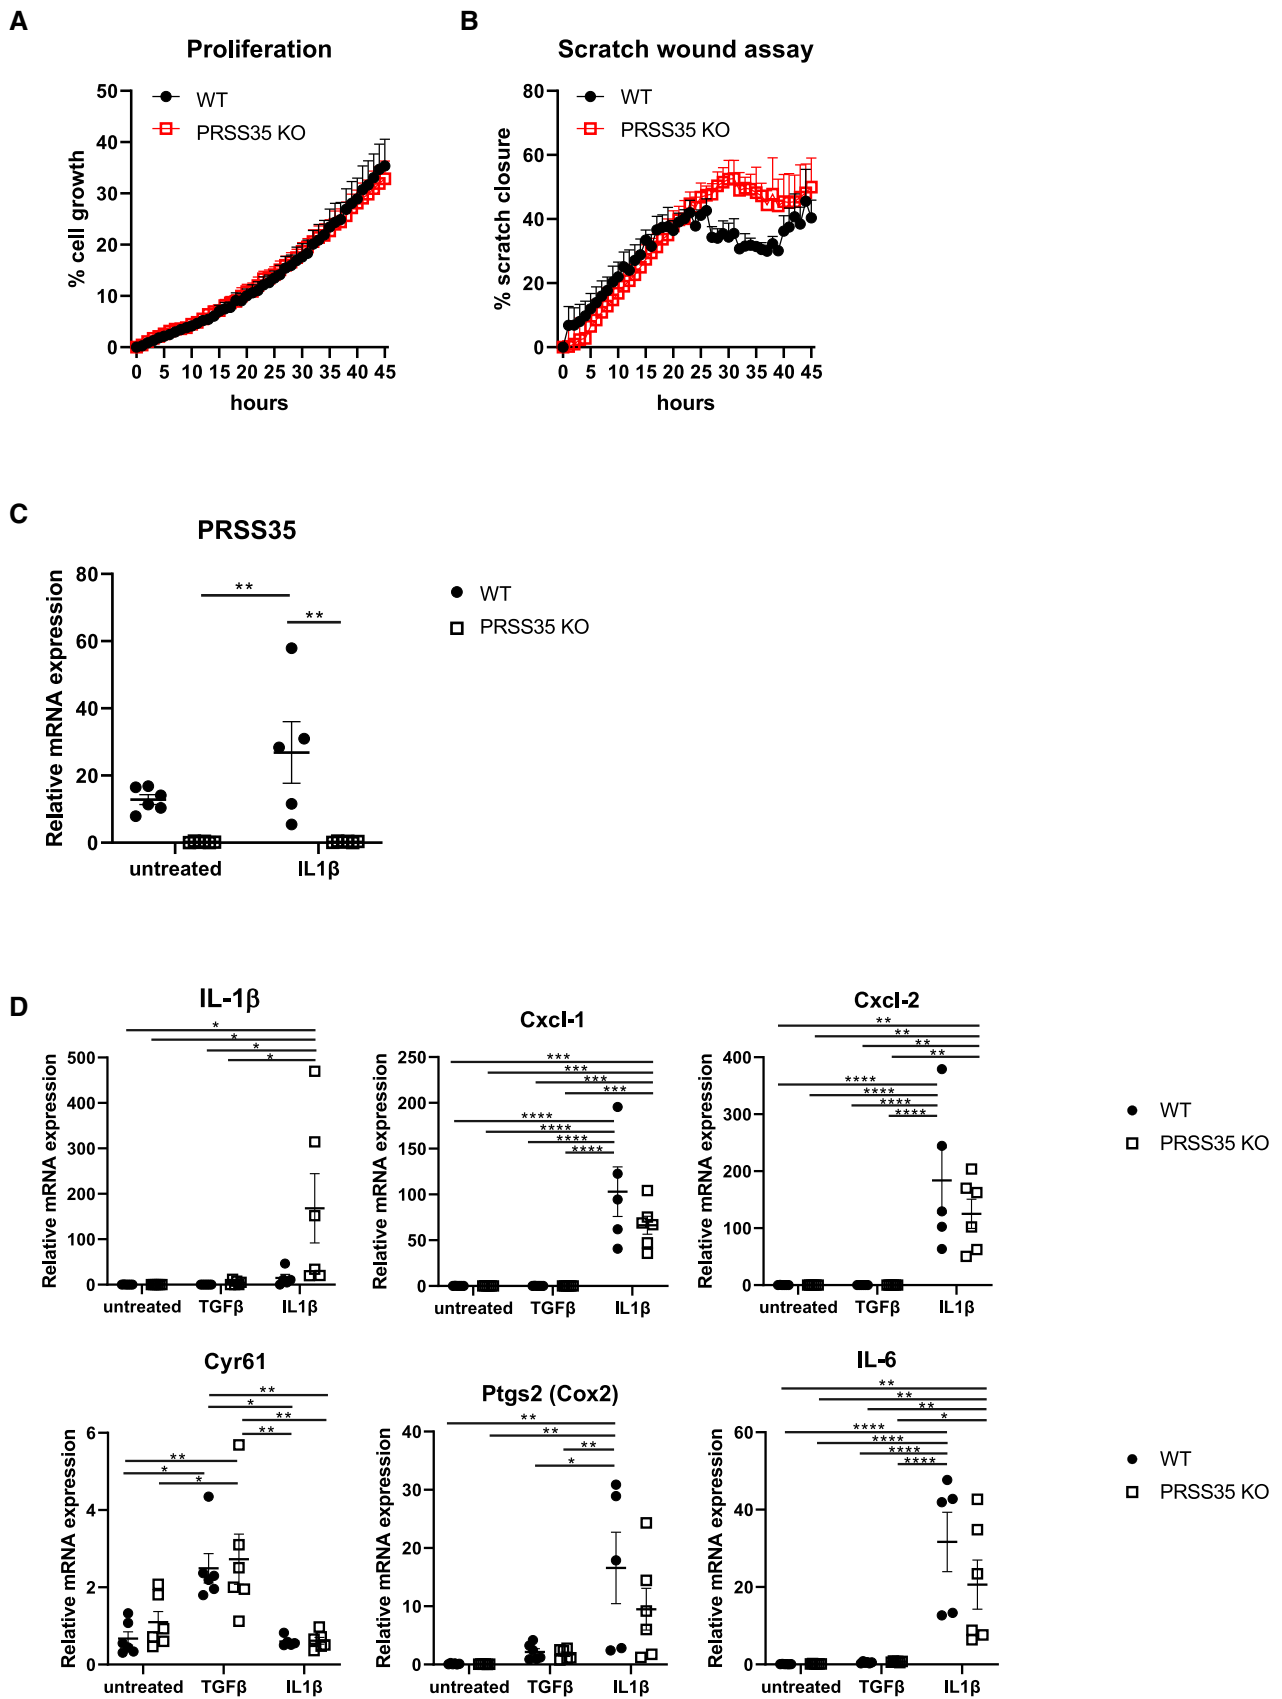

Figure EV3.
